# Supplementary material for: Boron and phosphorous-doped graphene as a metal-free electrocatalyst for the oxygen reduction reaction in alkaline medium
Source: Royal Society of Chemistry journal article supplement (doi:10.1039/c5ra06952a), 2015-01-01
Supplement: c5ra06952a1.pdf [file c5ra06952a1.pdf]

Electronic Supporting Information

**Boron and phosphorus-doped graphene as metal-free electrocatalyst for oxygen  
reduction reaction in alkaline medium**

Gayoung Jo, Jakkid Sanetuntikul and Sangaraju Shanmugam\*

Department of Energy Systems Engineering, Daegu Gyeongbuk Institute of Science and Technology  
(DGIST), 50-1 Sang-Ri, Hyeonpung-Myeon, Dalseong-Gun, Daegu, 711-873, Republic of Korea

E-mail:sangarajus@dgist.ac.kr

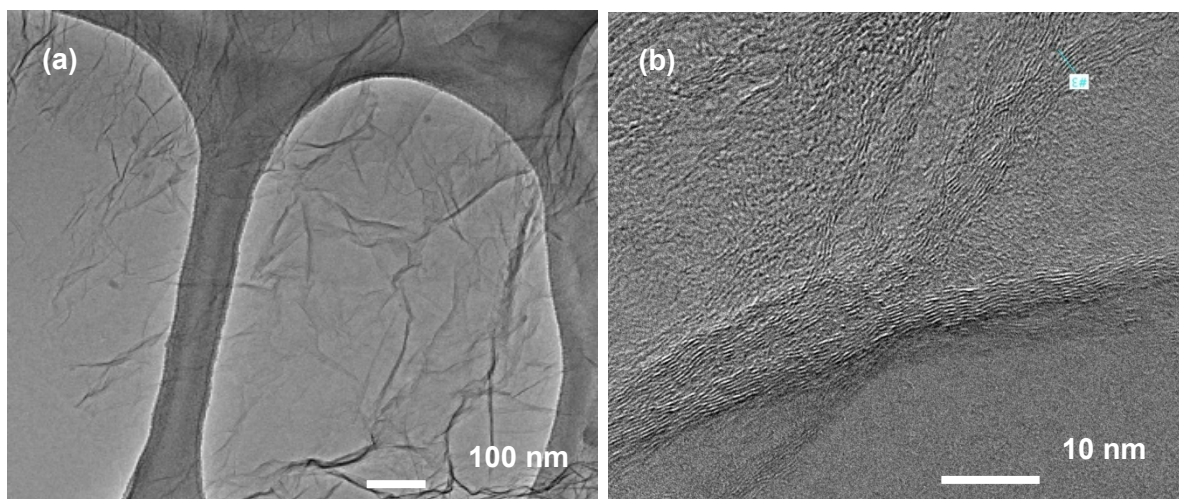

**Fig. S1.** (a) Low resolution and (b) high resolution TEM images of pristine graphene.

Table S1. The physico-chemical characterization and oxygen reduction activities of phosphorous or boron-doped graphene

| Sample | Atomic percent (at%) |      |      |      | Phosphorous or boron distribution (at%) |      |                  |                   |                 |                  | P/C or<br>B/C ratio<br>(at%) | $I_D/I_G$ | ORR activity                        |                                               |                     |
|--------|----------------------|------|------|------|-----------------------------------------|------|------------------|-------------------|-----------------|------------------|------------------------------|-----------|-------------------------------------|-----------------------------------------------|---------------------|
|        | C                    | O    | P    | B    | P-O                                     | P-C  | BCO <sub>2</sub> | BC <sub>2</sub> O | BC <sub>3</sub> | B <sub>4</sub> C |                              |           | Onset<br>potential<br><br>(vs. RHE) | $J_k$ (mAcm <sup>-2</sup> )<br><br>(at 0.7 V) | n<br><br>(at 0.3 V) |
| PDG    | 95.28                | 4.54 | 0.18 | 0    | 62.9                                    | 37.1 | 0                | 0                 | 0               | 0                | 0.19                         | 1.03      | 0.78                                | 1.80                                          | 3.98                |
| BDG    | 94.16                | 5.02 | 0    | 0.82 | 0                                       | 0    | 13.3             | 58.2              | 11.8            | 16.7             | 0.87                         | 1.36      | 0.82                                | 5.50                                          | 3.94                |
